# Supplementary material for: Implementing the WHO Safe Childbirth Checklist modified for preterm birth: lessons learned and experiences from Kenya and Uganda
Source: Springer Nature journal article supplement (doi:10.1186/s12913-022-07650-x), 2022-03-03
Supplement: MOESM2 [file 20189392]

**PRETERM BIRTH INITIATIVE - KENYA SAFE CHILDBIRTH CHECKLIST: FACILITY: \_\_\_\_\_**

| 1 FIRST PRESENTATION OF THE MOTHER :                                                  |                                                                                                                                                                                                                                                                                                                                                                                                                                                                                                        |                                                                                                                                                                                                                                                                                                                                                                                                                                                                                                                                                                                                                                        |
|---------------------------------------------------------------------------------------|--------------------------------------------------------------------------------------------------------------------------------------------------------------------------------------------------------------------------------------------------------------------------------------------------------------------------------------------------------------------------------------------------------------------------------------------------------------------------------------------------------|----------------------------------------------------------------------------------------------------------------------------------------------------------------------------------------------------------------------------------------------------------------------------------------------------------------------------------------------------------------------------------------------------------------------------------------------------------------------------------------------------------------------------------------------------------------------------------------------------------------------------------------|
| Date:                                                                                 | Time:                                                                                                                                                                                                                                                                                                                                                                                                                                                                                                  | Collected by:                                                                                                                                                                                                                                                                                                                                                                                                                                                                                                                                                                                                                          |
| Name:                                                                                 | DOB/Age:                                                                                                                                                                                                                                                                                                                                                                                                                                                                                               | File #                                                                                                                                                                                                                                                                                                                                                                                                                                                                                                                                                                                                                                 |
| Gravidity:                                                                            | Parity:                                                                                                                                                                                                                                                                                                                                                                                                                                                                                                | Phone number:                                                                                                                                                                                                                                                                                                                                                                                                                                                                                                                                                                                                                          |
| Sub-County                                                                            | Village:                                                                                                                                                                                                                                                                                                                                                                                                                                                                                               |                                                                                                                                                                                                                                                                                                                                                                                                                                                                                                                                                                                                                                        |
| 1.                                                                                    | <p style="text-align: center;"><i>Record all that apply.</i></p> Last normal menstrual period (LNMP): _____<br>Gestational age (GA) by LNMP: _____<br>GA by fundal height with tape measure, cm: _____<br>GA by ultrasound: _____                                                                                                                                                                                                                                                                      | <i>If &lt;37 weeks (preterm), admit or refer.</i>                                                                                                                                                                                                                                                                                                                                                                                                                                                                                                                                                                                      |
| 2.                                                                                    | Does patient have a history of preterm delivery?<br><input type="checkbox"/> Yes<br><input type="checkbox"/> No                                                                                                                                                                                                                                                                                                                                                                                        | <i>If yes, risk of preterm delivery is elevated.</i>                                                                                                                                                                                                                                                                                                                                                                                                                                                                                                                                                                                   |
| 3.                                                                                    | Does the mother need to be admitted for:<br><input type="checkbox"/> High blood pressure<br><input type="checkbox"/> High temperature/signs of active infection<br><input type="checkbox"/> Vaginal bleeding<br><input type="checkbox"/> High or low fetal heart rate<br><input type="checkbox"/> Preterm labor<br><input type="checkbox"/> Active Labor<br><input type="checkbox"/> Premature Rupture of membranes<br><input type="checkbox"/> Other, specify: _____<br><input type="checkbox"/> NONE | <b>Assess for indication that mother should be admitted or referred:</b> <ul style="list-style-type: none"> <li>• <i>If systolic blood pressure &gt;140 or diastolic blood pressure &gt;90, admit or refer. Start management of pre-eclampsia.</i></li> <li>• <i>If Temp <math>\geq 38^{\circ}\text{C}</math> or <math>&gt; 37.5^{\circ}\text{C}</math> axillary with signs of infection, admit or refer.</i></li> <li>• <i>If FHR &gt;160 or &lt;110, admit or refer. Further monitor.</i></li> <li>• <i>If preterm, initiate appropriate care or refer.</i></li> <li>• <i>If dilation more than 4 cm, admit or refer.</i></li> </ul> |
| 4.                                                                                    | Decision at this stage:<br><input type="checkbox"/> Admitted<br><input type="checkbox"/> Referred: Specify referral location: _____<br><input type="checkbox"/> Sent home: Indicate key plan/advise: _____<br>_____                                                                                                                                                                                                                                                                                    | <i>If unable to manage, refer.</i>                                                                                                                                                                                                                                                                                                                                                                                                                                                                                                                                                                                                     |
| 2 ON ADMISSION TO MATERNITY                                                           |                                                                                                                                                                                                                                                                                                                                                                                                                                                                                                        |                                                                                                                                                                                                                                                                                                                                                                                                                                                                                                                                                                                                                                        |
| Date:                                                                                 | Time:                                                                                                                                                                                                                                                                                                                                                                                                                                                                                                  | Collected by:                                                                                                                                                                                                                                                                                                                                                                                                                                                                                                                                                                                                                          |
| Mother's Name:                                                                        | Medical record/file #:                                                                                                                                                                                                                                                                                                                                                                                                                                                                                 |                                                                                                                                                                                                                                                                                                                                                                                                                                                                                                                                                                                                                                        |
| 1.                                                                                    | Is baby likely to be born $\leq 34$ weeks?<br><input type="checkbox"/> Yes<br><input type="checkbox"/> No                                                                                                                                                                                                                                                                                                                                                                                              | <p style="text-align: center;"><b><u>If YES, fill out &lt;34 weeks section below.</u></b><br/> <b><u>If NO, skip to ALL MOTHERS section below.</u></b></p>                                                                                                                                                                                                                                                                                                                                                                                                                                                                             |
| IF MOTHER IS LIKELY TO DELIVER $\leq 34$ WEEKS, CONSIDER CORTICOSTEROIDS & TOCOLYTICS |                                                                                                                                                                                                                                                                                                                                                                                                                                                                                                        |                                                                                                                                                                                                                                                                                                                                                                                                                                                                                                                                                                                                                                        |
| 2.                                                                                    | Is she a candidate for Antenatal corticosteroids?<br><input type="checkbox"/> Yes<br><input type="checkbox"/> No                                                                                                                                                                                                                                                                                                                                                                                       | <i>Give antenatal corticosteroids per national protocol i.e. if no evidence of maternal infection and delivery is imminent within 24 hours to seven days</i><br><b>Dexamethasone 6 mg IM BD x 2/7 OR</b><br><b>Betamethasone 12 mg IM OD x 2/7</b>                                                                                                                                                                                                                                                                                                                                                                                     |
| 3.                                                                                    | Is she a candidate for tocolytics?<br><input type="checkbox"/> Yes<br><input type="checkbox"/> No                                                                                                                                                                                                                                                                                                                                                                                                      | <i>Consider tocolytics (e.g. nifedipene) if giving steroids</i><br><b>Nifedipine 20 mg PO then 10-20 mg PO 4-8 hourly x 1-2/7</b>                                                                                                                                                                                                                                                                                                                                                                                                                                                                                                      |
| 4.                                                                                    | Is she a candidate for Magnesium Sulfate for fetal Neuroprotection?<br><input type="checkbox"/> Yes<br><input type="checkbox"/> No                                                                                                                                                                                                                                                                                                                                                                     | <i>Give for fetal neuroprotection if baby expected to be delivered before 32 weeks and delivery is imminent, within the next 24 hours</i><br><b>Magnesium sulfate 4 g IV with 5 g IM per buttock as initial dose (10 mg IM total), followed by 5 g IM q4 hours until delivery</b>                                                                                                                                                                                                                                                                                                                                                      |

**PRETERM BIRTH INITIATIVE - KENYA SAFE CHILDBIRTH CHECKLIST: FACILITY:** \_\_\_\_\_

|                    |                                                                                                                                                                                                                                                                                                                                                                                   |                                                                                                                                                                                                                                                                                                                                                                                                                                                                                                                                                                                                                                                                 |
|--------------------|-----------------------------------------------------------------------------------------------------------------------------------------------------------------------------------------------------------------------------------------------------------------------------------------------------------------------------------------------------------------------------------|-----------------------------------------------------------------------------------------------------------------------------------------------------------------------------------------------------------------------------------------------------------------------------------------------------------------------------------------------------------------------------------------------------------------------------------------------------------------------------------------------------------------------------------------------------------------------------------------------------------------------------------------------------------------|
| 5.                 | Preparation for preterm delivery?<br><input type="checkbox"/> Yes<br><input type="checkbox"/> No                                                                                                                                                                                                                                                                                  | Prepare for preterm birth <ul style="list-style-type: none"> <li>• Appropriate preterm bag and mask and/or PPV are available</li> <li>• Continuous warmth for unstable preterms (e.g blankets)</li> <li>• Ready to implement Kangaroo Care</li> <li>• Ready to do delayed cord clamping (DCC)</li> <li>• Staff assistance for delivery and resuscitation</li> </ul>                                                                                                                                                                                                                                                                                             |
| <b>ALL MOTHERS</b> |                                                                                                                                                                                                                                                                                                                                                                                   |                                                                                                                                                                                                                                                                                                                                                                                                                                                                                                                                                                                                                                                                 |
| 6.                 | Confirm <ul style="list-style-type: none"> <li><input type="checkbox"/> Supplies ready to clean hands</li> <li><input type="checkbox"/> Sterile gloves available for each vaginal exam?</li> <li><input type="checkbox"/> Birth companion encouraged to be present at birth</li> <li><input type="checkbox"/> Mother and companion informed to call for help if needed</li> </ul> | Call for help if any of the following: <ul style="list-style-type: none"> <li>• Bleeding</li> <li>• Severe abdominal pain</li> <li>• Severe headache or visual disturbance</li> <li>• Unable to urinate</li> <li>• Urge to push</li> <li>• Convulsions</li> <li>• Any other abnormality</li> </ul>                                                                                                                                                                                                                                                                                                                                                              |
| 7.                 | Does the mother require antibiotics?<br><input type="checkbox"/> Yes<br><input type="checkbox"/> No                                                                                                                                                                                                                                                                               | Give antibiotics if any of the following: <ul style="list-style-type: none"> <li>• PPRM</li> <li>• Signs of infection (e.g Temperature <math>\geq 38^{\circ}\text{C}</math>, Foul-smelling vaginal discharge)</li> <li>• Planned c-section</li> <li>• Rupture of membranes &gt; 18 hours</li> </ul>                                                                                                                                                                                                                                                                                                                                                             |
| 8.                 | Does the mother require Anti-malarials?<br><input type="checkbox"/> Yes<br><input type="checkbox"/> No                                                                                                                                                                                                                                                                            | Give anti-malarials if mother has: <ul style="list-style-type: none"> <li>• positive malaria smear</li> <li>• meets other diagnostic criteria for malaria</li> </ul>                                                                                                                                                                                                                                                                                                                                                                                                                                                                                            |
| 9.                 | Does the mother require Antiretroviral medicines?<br><input type="checkbox"/> Yes<br><input type="checkbox"/> No                                                                                                                                                                                                                                                                  | If mother is HIV+, manage as per the guidelines                                                                                                                                                                                                                                                                                                                                                                                                                                                                                                                                                                                                                 |
| 10.                | Does the mother require Anti- hypertensive treatment?<br><input type="checkbox"/> Yes<br><input type="checkbox"/> No                                                                                                                                                                                                                                                              | If systolic blood pressure $\geq 160$ or diastolic blood pressure $\geq 110$ , or if approaching these levels.<br><br><b>For acute IV management:</b><br><b>Hydralazine 5-10 mg IV, if still elevated after 20 min, repeat dose</b><br><b>OR</b><br><b>Labetalol 20 mg IV fist dose, if still elevated after 20 min, 40 mg</b><br><b>Then initiate oral medication.</b>                                                                                                                                                                                                                                                                                         |
| 11.                | Does the mother require Magnesium sulfate for pre-eclampsia?<br><input type="checkbox"/> Yes<br><input type="checkbox"/> No                                                                                                                                                                                                                                                       | Give Mg SO <sub>4</sub> if patient has the following: <ul style="list-style-type: none"> <li>• systolic blood pressure <math>\geq 140</math> mmHg</li> <li>• diastolic blood pressure <math>\geq 90</math> mmHg</li> </ul> <b>AND any of the following:</b> <ul style="list-style-type: none"> <li>• convulsions or coma</li> <li>• severe headache</li> <li>• visual disturbance</li> <li>• epigastric pain</li> </ul> <b>OR SBP <math>\geq 160</math> mmHg OR diastolic blood pressure <math>\geq 110</math> mmHg</b><br><b>Magnesium sulfate 4 g IV with 5 g IM per buttock as initial dose (10 mg IM total), followed by 5 g IM q4 hours until delivery</b> |
| 12.                | Is the mother bleeding?<br><input type="checkbox"/> Yes<br><input type="checkbox"/> No                                                                                                                                                                                                                                                                                            | If yes, evaluate and treat per guidelines.<br>Prepare for a Caesarean section delivery if indicated.<br>Consider referral if unable to manage appropriately.                                                                                                                                                                                                                                                                                                                                                                                                                                                                                                    |

**PRETERM BIRTH INITIATIVE - KENYA SAFE CHILDBIRTH CHECKLIST: FACILITY: \_\_\_\_\_**

|     |                                                                                                                                                                                                                                                                                                                                                                                                                                                                                                                                                                                                            |                                                                                                             |
|-----|------------------------------------------------------------------------------------------------------------------------------------------------------------------------------------------------------------------------------------------------------------------------------------------------------------------------------------------------------------------------------------------------------------------------------------------------------------------------------------------------------------------------------------------------------------------------------------------------------------|-------------------------------------------------------------------------------------------------------------|
| 13. | Does mother have other known disease?<br><input type="checkbox"/> None<br><input type="checkbox"/> Anemia<br><input type="checkbox"/> Chronic hypertension<br><input type="checkbox"/> Diabetes mellitus<br><input type="checkbox"/> Other condition, specify: _____                                                                                                                                                                                                                                                                                                                                       | <i>If yes, ensure appropriate treatment.</i>                                                                |
| 14. | Has Partograph been started?<br><input type="checkbox"/> Yes<br><input type="checkbox"/> No, will start when $\geq$ 4cm                                                                                                                                                                                                                                                                                                                                                                                                                                                                                    | <i>Ensure adherence to partograph guidelines.</i>                                                           |
| 15. | Does fetus have any concerning features/issues?<br><input type="checkbox"/> No<br><input type="checkbox"/> Fetal HR > 160 or < 100<br><input type="checkbox"/> Fetal heart rate irregular<br><input type="checkbox"/> No fetal heart beat<br><input type="checkbox"/> Malposition (breech, etc.)<br><input type="checkbox"/> Suspicion for intrauterine growth restriction<br><input type="checkbox"/> Suspected or confirmed fetal anomaly<br><input type="checkbox"/> Multiple pregnancy<br><input type="checkbox"/> Meconium stained liquor<br><input type="checkbox"/> Other condition, specify: _____ | <i>If yes, prepare for birth with additional staff assistance for delivery or call for appropriate help</i> |
| 16. | Does mother need referral?<br><input type="checkbox"/> Yes, Specify facility _____<br><input type="checkbox"/> No                                                                                                                                                                                                                                                                                                                                                                                                                                                                                          | <i>If referral is not possible, note reason here:</i>                                                       |
| 17. | Does the mother have a plan for post-partum contraception?<br><input type="checkbox"/> Yes<br><input type="checkbox"/> No                                                                                                                                                                                                                                                                                                                                                                                                                                                                                  | <i>Discuss and offer family planning options to mother</i>                                                  |

**3 JUST BEFORE AND DURING SECOND & THIRD STAGE**

Date: \_\_\_\_\_ Time: \_\_\_\_\_ Collected by: \_\_\_\_\_

Mother's Name: \_\_\_\_\_ Medical record/file #: \_\_\_\_\_

**CONFIRM ESSENTIAL SUPPLIES AND SKILLS FOR MANAGEMENT OF LABOUR AND NEWBORN INCLUDING PRETERM DELIVERY**

|    |                                                                                                                                                                                                                                                                                                                                                                                                 |                                                                                                                                                                                                                                                                                                                                                                                                                                                               |
|----|-------------------------------------------------------------------------------------------------------------------------------------------------------------------------------------------------------------------------------------------------------------------------------------------------------------------------------------------------------------------------------------------------|---------------------------------------------------------------------------------------------------------------------------------------------------------------------------------------------------------------------------------------------------------------------------------------------------------------------------------------------------------------------------------------------------------------------------------------------------------------|
| 1. | Confirm availability of essential supplies for delivery.<br><input type="checkbox"/> Sterile gloves<br><input type="checkbox"/> Soap and clean water<br><input type="checkbox"/> Delivery packs<br><input type="checkbox"/> Oxytocin<br><input type="checkbox"/> Syringes<br><input type="checkbox"/> IV fluids and giving-sets<br><input type="checkbox"/> Essential and Emergency medications | <i>Ensure all supplies for second and third stage are available.</i>                                                                                                                                                                                                                                                                                                                                                                                          |
| 2. | Assistant identified and informed to be ready to help with birth INCLUDING skilled for management of a <b>preterm birth</b> ?<br><input type="checkbox"/> Yes<br><input type="checkbox"/> No                                                                                                                                                                                                    | <i>Prepare to care for baby immediately after birth:</i><br><ol style="list-style-type: none"> <li>1. Delayed cord clamping (DCC)</li> <li>2. Dry baby, keep warm</li> <li>3. If not breathing, stimulate and clear airway if needed</li> <li>4. If still not breathing: <ul style="list-style-type: none"> <li>• clamp and cut cord</li> <li>• clean airway if necessary</li> <li>• ventilate with bag-and-mask</li> </ul> </li> </ol> <i>shout for help</i> |

**PRETERM BIRTH INITIATIVE - KENYA SAFE CHILDBIRTH CHECKLIST: FACILITY:** \_\_\_\_\_

|                        |                                                                                                                                                                                                                                                                                                                                                                                                                                                                                                                                                                                                           |                                                                                                                                                                                                                                                                                                                                                                                                                    |
|------------------------|-----------------------------------------------------------------------------------------------------------------------------------------------------------------------------------------------------------------------------------------------------------------------------------------------------------------------------------------------------------------------------------------------------------------------------------------------------------------------------------------------------------------------------------------------------------------------------------------------------------|--------------------------------------------------------------------------------------------------------------------------------------------------------------------------------------------------------------------------------------------------------------------------------------------------------------------------------------------------------------------------------------------------------------------|
| 3.                     | Confirm availability of essential supplies for the newborn baby including preterm babies.<br><input type="checkbox"/> Clean towel<br><input type="checkbox"/> Suction device<br><input type="checkbox"/> Bag and mask, including appropriate size for preterm babies                                                                                                                                                                                                                                                                                                                                      |                                                                                                                                                                                                                                                                                                                                                                                                                    |
| 4.                     | Does mother have delayed second stage?<br><input type="checkbox"/> Yes<br><input type="checkbox"/> No                                                                                                                                                                                                                                                                                                                                                                                                                                                                                                     | <i>If Yes, prepare for appropriate interventions e.g. assisted vaginal delivery, caesarean section and appropriate neonatal care.</i>                                                                                                                                                                                                                                                                              |
| 5.                     | Does the mother require Magnesium sulfate?<br><input type="checkbox"/> Yes, for pre-eclampsia<br><input type="checkbox"/> Yes, for fetal neuroprotection<br><input type="checkbox"/> No                                                                                                                                                                                                                                                                                                                                                                                                                   | <i>See indications for when to give for fetal neuroprotection and/or maternal pre-eclampsia above.</i><br><br><b>Magnesium sulfate 4 g IV with 5 g IM per buttock as initial dose (10 mg IM total), followed by 5 g IM q4 hours</b>                                                                                                                                                                                |
| 6.                     | Is mother likely to deliver a preterm?<br><input type="checkbox"/> Yes<br><input type="checkbox"/> No                                                                                                                                                                                                                                                                                                                                                                                                                                                                                                     | <i>Prepare for preterm birth:</i> <ul style="list-style-type: none"> <li>• <i>Appropriate preterm bag and mask and/or PPV are available</i></li> <li>• <i>Continuous warmth for unstable preterms (e.g blankets)</i></li> <li>• <i>Readiness to implement Kangaroo Care</i></li> <li>• <i>Ready to do delayed cord clamping (DCC)</i></li> <li>• <i>Staff assistance for delivery and resuscitation</i></li> </ul> |
| <b>4.</b>              | <b>SOON AFTER BIRTH - WITHIN ONE HOUR</b>                                                                                                                                                                                                                                                                                                                                                                                                                                                                                                                                                                 |                                                                                                                                                                                                                                                                                                                                                                                                                    |
| Date:                  |                                                                                                                                                                                                                                                                                                                                                                                                                                                                                                                                                                                                           | Time:                                                                                                                                                                                                                                                                                                                                                                                                              |
| Mother's name:         |                                                                                                                                                                                                                                                                                                                                                                                                                                                                                                                                                                                                           | Baby's name:                                                                                                                                                                                                                                                                                                                                                                                                       |
| Medical record/file #: |                                                                                                                                                                                                                                                                                                                                                                                                                                                                                                                                                                                                           | Collected by:                                                                                                                                                                                                                                                                                                                                                                                                      |
| 1.                     | Does mom have any concerning features?<br><input type="checkbox"/> High blood pressure<br><input type="checkbox"/> High temperature/signs of active infection<br><input type="checkbox"/> Heavy vaginal bleeding<br><input type="checkbox"/> Other _____<br><input type="checkbox"/> NONE                                                                                                                                                                                                                                                                                                                 | <i>IF yes treat appropriately</i>                                                                                                                                                                                                                                                                                                                                                                                  |
| 2.                     | Does this baby have any concerning features?<br><input type="checkbox"/> Yes<br><input type="checkbox"/> No<br><br>If yes, mark all that apply:<br><input type="checkbox"/> Signs of respiratory distress<br><input type="checkbox"/> Signs of birth asphyxia<br><input type="checkbox"/> Fetal anomaly<br><input type="checkbox"/> Weight <2500g<br><input type="checkbox"/> Signs of Prematurity<br><input type="checkbox"/> Signs of infection<br><input type="checkbox"/> Signs of anemia<br><input type="checkbox"/> Unable to suck well<br><input type="checkbox"/> Other condition, specify: _____ | <i>If yes,</i> <ul style="list-style-type: none"> <li>• <i>Manage appropriately</i></li> <li>• <i>Call for help</i></li> <li>• <i>Ensure close monitoring after discharge</i></li> </ul>                                                                                                                                                                                                                           |
| 3.                     | <input type="checkbox"/> Ensure baby started immediate breastfeeding and skin-to-skin contact initiated (if mother & baby are well).                                                                                                                                                                                                                                                                                                                                                                                                                                                                      | For preterm encourage breast milk BUT determine appropriate mode of feeding:<br><input type="checkbox"/> Breastfeeding<br><input type="checkbox"/> Cup feeding on Expressed Breast Milk<br><input type="checkbox"/> Nasogastric Tube Feeding on Expressed Breast Milk                                                                                                                                              |

**PRETERM BIRTH INITIATIVE - KENYA SAFE CHILDBIRTH CHECKLIST: FACILITY: \_\_\_\_\_**

|                                                               |                                                                                                                                                                                                                                                                                           |                                                                                                                                                                                                                                                                                                                                                                                                                   |
|---------------------------------------------------------------|-------------------------------------------------------------------------------------------------------------------------------------------------------------------------------------------------------------------------------------------------------------------------------------------|-------------------------------------------------------------------------------------------------------------------------------------------------------------------------------------------------------------------------------------------------------------------------------------------------------------------------------------------------------------------------------------------------------------------|
| 4.                                                            | Routine newborn care:<br><input type="checkbox"/> Delayed cord clamping<br><input type="checkbox"/> Vitamin K injection<br><input type="checkbox"/> Antibiotic eye ointment<br><input type="checkbox"/> Cord care                                                                         | <b>Vitamin K:</b><br><b>Weight &lt;1.5 kg: 0.5 mg IM</b><br><b>Weight &gt;1.5 kg: 1 mg IM</b>                                                                                                                                                                                                                                                                                                                     |
| 5.                                                            | Observations/anthropometric measurements taken?<br><input type="checkbox"/> Weight: _____ gms<br><input type="checkbox"/> Length _____ cm<br><input type="checkbox"/> Head circumference _____ cm<br><input type="checkbox"/> Other, specify _____                                        |                                                                                                                                                                                                                                                                                                                                                                                                                   |
| 6.                                                            | Gestational age confirmed?<br><input type="checkbox"/> Yes, _____ weeks<br><input type="checkbox"/> No<br>If yes, GA method used (weight, LMP, Ballard Score, Other):<br>_____                                                                                                            | <i>If below 37 weeks, initiate preterm care (i.e., thermal care, resuscitation as needed, weight based dosing of meds, referral, etc.) if needed.</i>                                                                                                                                                                                                                                                             |
| 7.                                                            | Does the baby require Antibiotics?<br><input type="checkbox"/> Yes<br><input type="checkbox"/> No                                                                                                                                                                                         | <i>Give if:</i> <ul style="list-style-type: none"> <li>• antibiotics were given to mother</li> <li>• baby has signs of breathing too fast (&gt;60 breaths min) or too slow (&lt;30 breaths min)</li> <li>• chest in-drawing, grunting or convulsions</li> <li>• no movement on stimulation</li> <li>• baby's temperature is too cold (&lt; 35°C and not rising after warming) or too hot (&gt; 37.5°C)</li> </ul> |
| 8.                                                            | Does the baby require Antiretrovirals?<br><input type="checkbox"/> Yes<br><input type="checkbox"/> No                                                                                                                                                                                     | <i>Adhere to MOH guidelines on management of ARVs use in infants.</i>                                                                                                                                                                                                                                                                                                                                             |
| <b>CONFIRM NEED AND READINESS FOR CONTINUING THERMAL CARE</b> |                                                                                                                                                                                                                                                                                           |                                                                                                                                                                                                                                                                                                                                                                                                                   |
| 9.                                                            | Confirm readiness for thermal care.<br><input type="checkbox"/> Yes<br><input type="checkbox"/> No<br><input type="checkbox"/> NOT REQUIRED                                                                                                                                               | <i>If YES Ensure the following:</i> <ul style="list-style-type: none"> <li>• Educate the mother on skin to skin and KMC (awareness)</li> <li>• Knowledge and skills of the health provider for KMC</li> <li>• Space and furniture for KMC</li> <li>• Continuous warmth for unstable preterm babies, eg. Blankets</li> </ul>                                                                                       |
| 10.                                                           | Does baby require Kangaroo Mother Care?<br><input type="checkbox"/> Yes, initiated immediately or within one hour after birth<br><input type="checkbox"/> Yes, initiated more than one hour after birth<br><input type="checkbox"/> Yes, but not initiated<br><input type="checkbox"/> No | <i>Consider for stable preterm and low birth weight babies.</i>                                                                                                                                                                                                                                                                                                                                                   |
| 11.                                                           | Is referral of baby needed?<br><input type="checkbox"/> Yes, specify diagnosis: _____<br><input type="checkbox"/> No<br>If yes, specify facility referred to: _____                                                                                                                       | <i>If yes, follow your facility's protocol for referral.</i>                                                                                                                                                                                                                                                                                                                                                      |
| <b>5 AT DISCHARGE</b>                                         |                                                                                                                                                                                                                                                                                           |                                                                                                                                                                                                                                                                                                                                                                                                                   |
| Date: _____                                                   |                                                                                                                                                                                                                                                                                           | Time: _____                                                                                                                                                                                                                                                                                                                                                                                                       |
| Mother's name: _____                                          |                                                                                                                                                                                                                                                                                           | Collected by: _____                                                                                                                                                                                                                                                                                                                                                                                               |
| Medical record/file #: _____                                  |                                                                                                                                                                                                                                                                                           | Baby's name: _____                                                                                                                                                                                                                                                                                                                                                                                                |
| Telephone: _____                                              |                                                                                                                                                                                                                                                                                           | Village: _____                                                                                                                                                                                                                                                                                                                                                                                                    |

**PRETERM BIRTH INITIATIVE - KENYA SAFE CHILDBIRTH CHECKLIST: FACILITY:** \_\_\_\_\_

|                                                                                                                                                                                                                                       |                                                                                                                                                                                                                                                                                                                                                                                                                                  |                                                                                                                                                                                                                                                                              |
|---------------------------------------------------------------------------------------------------------------------------------------------------------------------------------------------------------------------------------------|----------------------------------------------------------------------------------------------------------------------------------------------------------------------------------------------------------------------------------------------------------------------------------------------------------------------------------------------------------------------------------------------------------------------------------|------------------------------------------------------------------------------------------------------------------------------------------------------------------------------------------------------------------------------------------------------------------------------|
| <p>1. Infant status?<br/> <input type="checkbox"/> Alive<br/> <input type="checkbox"/> Dead<br/>                 If Alive, indicate whether:<br/> <input type="checkbox"/> Discharged home<br/> <input type="checkbox"/> Referred</p> | <p>If referred, specify:<br/>                 Facility referred to:<br/>                 _____<br/> <br/>                 Condition:<br/>                 _____</p>                                                                                                                                                                                                                                                              | <p>If discharged home, specify:<br/>                 Date of discharge: _____<br/>                 Time of discharge: _____<br/>                 Age at discharge (days) _____<br/>                 Infant weight at discharge (grams) _____</p>                             |
| <p>2. Is the baby feeding well?<br/> <input type="checkbox"/> Yes<br/> <input type="checkbox"/> No</p>                                                                                                                                | <p><i>If no, re-consider if needs to stay in nursery/facility for assistance in feeding</i><br/> <i>If okay to be discharged, give appropriate advice and recommend close follow-up</i></p>                                                                                                                                                                                                                                      |                                                                                                                                                                                                                                                                              |
| <p>3. Has the baby been on antibiotics?<br/> <input type="checkbox"/> Yes, dose completed<br/> <input type="checkbox"/> Yes, dose not completed<br/> <input type="checkbox"/> No</p>                                                  | <p><i>Advise on completion of dose at home and recommend follow-up</i></p>                                                                                                                                                                                                                                                                                                                                                       |                                                                                                                                                                                                                                                                              |
| <p>4. Does the baby need to continue with Kangaroo Mother care?<br/> <input type="checkbox"/> Yes<br/> <input type="checkbox"/> No</p>                                                                                                | <p><i>If Yes:</i></p> <ul style="list-style-type: none"> <li>• <i>Recommend and advise on KMC at home for preterm and low birth weight babies.</i></li> <li>• <i>Recommend close follow-up including phone calls.</i></li> </ul>                                                                                                                                                                                                 |                                                                                                                                                                                                                                                                              |
| <p>5. Length of stay(days) in the facility: _____ days<br/>                 If stay &gt;28 days, specify reason(s): _____</p>                                                                                                         |                                                                                                                                                                                                                                                                                                                                                                                                                                  |                                                                                                                                                                                                                                                                              |
| <p>6. Is the mother well?<br/> <input type="checkbox"/> Yes<br/> <input type="checkbox"/> No</p>                                                                                                                                      | <p><i>If No, states concerns and advise on appropriate management.</i></p>                                                                                                                                                                                                                                                                                                                                                       |                                                                                                                                                                                                                                                                              |
| <p>7. Does the mother have a plan for post-partum contraception?<br/> <input type="checkbox"/> Yes<br/> <input type="checkbox"/> No</p>                                                                                               | <p><i>Discuss and offer family planning options to mother</i></p>                                                                                                                                                                                                                                                                                                                                                                |                                                                                                                                                                                                                                                                              |
| <p>8. <input type="checkbox"/> Advise mother to report for review if the following danger signs are noted.</p>                                                                                                                        | <p><b>Mother:</b></p> <ul style="list-style-type: none"> <li>• <i>Bleeding (soaking more than 2 pads per hour or otherwise concerned about the bleeding)</i></li> <li>• <i>Severe abdominal pain</i></li> <li>• <i>Severe headache or visual disturbance</i></li> <li>• <i>Breathing difficulty</i></li> <li>• <i>Fever or chills</i></li> <li>• <i>Difficulty emptying bladder</i></li> <li>• <i>Epigastric pain</i></li> </ul> | <p><b>Baby:</b></p> <ul style="list-style-type: none"> <li>• <i>Fast/difficult breathing</i></li> <li>• <i>Fever, unusually cold</i></li> <li>• <i>Stops feeding well</i></li> <li>• <i>Less activity than normal</i></li> <li>• <i>Whole body becomes yellow</i></li> </ul> |
| <p>9. Follow-up arranged for mother and baby?<br/> <input type="checkbox"/> Yes<br/> <input type="checkbox"/> No<br/>                 Date of next appointment: _____</p>                                                             | <p><b>For preterm and/or low birth weight infants:</b></p> <ul style="list-style-type: none"> <li>• <i>Schedule telephone calls daily for the first 72 hours, thereafter twice weekly until baby is 28 days old.</i></li> <li>• <i>Recommend weekly follow-up in health facilities</i></li> <li>• <i>Actively follow-up will be done by phone and home visits if missed appointments</i></li> </ul>                              |                                                                                                                                                                                                                                                                              |
| <p><b>10. If the baby was preterm or low birth weight, request for consent for follow-up by phone calls and home visits.</b></p>                                                                                                      |                                                                                                                                                                                                                                                                                                                                                                                                                                  |                                                                                                                                                                                                                                                                              |
