# Supplementary material for: Implementing the WHO Safe Childbirth Checklist modified for preterm birth: lessons learned and experiences from Kenya and Uganda
Source: Springer Nature journal article supplement (doi:10.1186/s12913-022-07650-x), 2022-03-03
Supplement: MOESM3 [file 20189392]

| <b>1 FIRST PRESENTATION OF THE MOTHER (TRIAGE)</b>                                                                                                                                                                                                                                                                                                                                                                                                                                        |                |                                                                                                                                                                                                                                                                                                                                                                                                                                                                                                                                                                                                                         |
|-------------------------------------------------------------------------------------------------------------------------------------------------------------------------------------------------------------------------------------------------------------------------------------------------------------------------------------------------------------------------------------------------------------------------------------------------------------------------------------------|----------------|-------------------------------------------------------------------------------------------------------------------------------------------------------------------------------------------------------------------------------------------------------------------------------------------------------------------------------------------------------------------------------------------------------------------------------------------------------------------------------------------------------------------------------------------------------------------------------------------------------------------------|
| Date: _____                                                                                                                                                                                                                                                                                                                                                                                                                                                                               | Time: _____    | Collected by: _____                                                                                                                                                                                                                                                                                                                                                                                                                                                                                                                                                                                                     |
| Name: _____                                                                                                                                                                                                                                                                                                                                                                                                                                                                               | DOB/Age: _____ | File #: _____                                                                                                                                                                                                                                                                                                                                                                                                                                                                                                                                                                                                           |
| Gravidity: _____                                                                                                                                                                                                                                                                                                                                                                                                                                                                          | Parity: _____  | Phone number: _____                                                                                                                                                                                                                                                                                                                                                                                                                                                                                                                                                                                                     |
| Last normal menstrual period (LNMP): _____<br>Gestational age (GA) by LNMP: _____<br>GA by fundal height with tape measure, cm: _____<br>Gestational age by ultrasound: _____<br><i>Record all that apply.</i>                                                                                                                                                                                                                                                                            |                |                                                                                                                                                                                                                                                                                                                                                                                                                                                                                                                                                                                                                         |
|                                                                                                                                                                                                                                                                                                                                                                                                                                                                                           |                | <i>If &lt;37 weeks (preterm), admit or refer.</i>                                                                                                                                                                                                                                                                                                                                                                                                                                                                                                                                                                       |
| Does patient have a history of preterm delivery?<br><input type="checkbox"/> Yes<br><input type="checkbox"/> No                                                                                                                                                                                                                                                                                                                                                                           |                |                                                                                                                                                                                                                                                                                                                                                                                                                                                                                                                                                                                                                         |
|                                                                                                                                                                                                                                                                                                                                                                                                                                                                                           |                | <i>If yes, risk of preterm delivery is elevated.</i>                                                                                                                                                                                                                                                                                                                                                                                                                                                                                                                                                                    |
| Does the mother need to be admitted for:<br><input type="checkbox"/> High blood pressure<br><input type="checkbox"/> High temperature/signs of active infection<br><input type="checkbox"/> Heavy vaginal bleeding<br><input type="checkbox"/> High or low fetal heart rate<br><input type="checkbox"/> Preterm labor or rupture of membranes<br><input type="checkbox"/> Active Labor<br><input type="checkbox"/> Rupture of membranes<br><input type="checkbox"/> Other, specify: _____ |                | <i>Assess for indication that mother should be admitted or referred:</i> <ul style="list-style-type: none"> <li><i>If systolic blood pressure &gt;140 or diastolic blood pressure &gt;90, admit or refer. Start management of pre-eclampsia.</i></li> <li><i>If <math>\geq 38^{\circ}\text{C}</math> or <math>&gt; 37.5^{\circ}\text{C}</math> axillary with signs of infection, admit or refer.</i></li> <li><i>If FHR &gt;160 or &lt;110, admit or refer. Further monitor.</i></li> <li><i>If preterm, initiate appropriate care or refer.</i></li> <li><i>If dilation more than 4 cm, admit or refer.</i></li> </ul> |
| Mother's status?<br><input type="checkbox"/> Admitted<br><input type="checkbox"/> Referred. Specify referral location: _____<br><input type="checkbox"/> Sent home                                                                                                                                                                                                                                                                                                                        |                | <i>If unable to manage, refer.</i>                                                                                                                                                                                                                                                                                                                                                                                                                                                                                                                                                                                      |

| <span style="font-size: 24px; font-weight: bold; margin-right: 10px;">2</span> <b>ON ADMISSION TO MATERNITY</b>                                                                                      |  |                                                                                                                                                                                                                                                                                                 |                                |
|------------------------------------------------------------------------------------------------------------------------------------------------------------------------------------------------------|--|-------------------------------------------------------------------------------------------------------------------------------------------------------------------------------------------------------------------------------------------------------------------------------------------------|--------------------------------|
| Date: _____                                                                                                                                                                                          |  | Time: _____                                                                                                                                                                                                                                                                                     | Collected by: _____            |
| Name: _____                                                                                                                                                                                          |  | DOB/Age: _____                                                                                                                                                                                                                                                                                  | File#: _____<br>Phone #: _____ |
| <b>FOR MOTHERS &lt;34 WEEKS (IF NOT, SKIP TO NEXT SECTION)</b>                                                                                                                                       |  |                                                                                                                                                                                                                                                                                                 |                                |
| Does mother need antenatal corticosteroids?<br><input type="checkbox"/> Yes, given<br><input type="checkbox"/> No                                                                                    |  | <i>Give antenatal corticosteroids per national protocol (if no evidence of maternal infection and delivery is imminent within 24 hours to seven days).</i>                                                                                                                                      |                                |
| Does mother need tocolytics (medication to stop uterine contractions)?<br><input type="checkbox"/> Yes, given<br><input type="checkbox"/> No                                                         |  | <i>Consider tocolytics (e.g. nifedipene) if giving steroids.</i>                                                                                                                                                                                                                                |                                |
| Does mother need antibiotics?<br><input type="checkbox"/> Yes, given<br><input type="checkbox"/> No                                                                                                  |  | <i>Give antibiotics:</i> <ul style="list-style-type: none"> <li>PPROM 28-34 weeks</li> <li>temperature &gt; 38°C or &gt; 37.5°C axillary</li> <li>foul-smelling vaginal discharge</li> </ul>                                                                                                    |                                |
| Does mother need magnesium sulfate for fetal neuroprotection?<br><input type="checkbox"/> Yes, given<br><input type="checkbox"/> No                                                                  |  | <i>Consider magnesium sulfate for fetal neuroprotection if imminent preterm birth delivery between 28-32 weeks of gestation.</i>                                                                                                                                                                |                                |
| <b>ALL MOTHERS (all gestational age)</b>                                                                                                                                                             |  |                                                                                                                                                                                                                                                                                                 |                                |
| Does mother need antibiotics?<br><input type="checkbox"/> Yes, given<br><input type="checkbox"/> Yes, already given for preterm indication<br><input type="checkbox"/> No                            |  | <i>Give antibiotics if any of the following:</i> <ul style="list-style-type: none"> <li>temperature &gt; 38°C or &gt; 37.5°C axillary</li> <li>foul-smelling vaginal discharge</li> <li>rupture of membranes &gt; 12 hours</li> </ul>                                                           |                                |
| Does mother need anti-malarials?<br><input type="checkbox"/> Yes, given<br><input type="checkbox"/> No                                                                                               |  | <i>Give anti-malarials if mother has temp &gt;38°C or &gt; 37.5°C axillary and:</i> <ul style="list-style-type: none"> <li>positive malaria smear</li> <li>meets other diagnostic criteria for malaria</li> </ul>                                                                               |                                |
| Does mother need antiretroviral medicine?<br><input type="checkbox"/> Yes, given<br><input type="checkbox"/> No                                                                                      |  | <i>Give if mother is HIV+ and in labor.<br/>If on ARVs, remind mother to take her medicine.</i>                                                                                                                                                                                                 |                                |
| Does mother need magnesium sulfate for pre-eclampsia?<br><input type="checkbox"/> Yes, given<br><input type="checkbox"/> Yes, already given for fetal neuroprotection<br><input type="checkbox"/> No |  | <i>Give if any of:</i> <ul style="list-style-type: none"> <li>diastolic blood pressure <math>\geq</math> 110 mmHg and 3+ proteinuria</li> <li>diastolic blood pressure <math>\geq</math> 90 mmHg, 2+ proteinuria AND if any: severe headache, visual disturbance, or epigastric pain</li> </ul> |                                |
| Does mother need Anti- hypertensive treatment?<br><input type="checkbox"/> Yes, given<br><input type="checkbox"/> No                                                                                 |  | <i>Give if systolic blood pressure <math>\geq</math> 160 mmHg.</i>                                                                                                                                                                                                                              |                                |
| Does mother have significant bleeding?<br><input type="checkbox"/> Yes<br><input type="checkbox"/> No                                                                                                |  | <i>If yes, follow clinical guidelines for management.<br/>Prepare for obstetric hemorrhage and neonatal compromise.<br/>Consider referral if unable to manage appropriately.</i>                                                                                                                |                                |

**SAFE CHILDBIRTH CHECKLIST AND CASE SHEET**

**Unique identifier :** \_\_\_\_\_

|                                                                                                                                                                                                                                                                                                                                                                                                                                                                                                                                                                                                                                                     |                                                                                                                                                                                                                                                                                  |
|-----------------------------------------------------------------------------------------------------------------------------------------------------------------------------------------------------------------------------------------------------------------------------------------------------------------------------------------------------------------------------------------------------------------------------------------------------------------------------------------------------------------------------------------------------------------------------------------------------------------------------------------------------|----------------------------------------------------------------------------------------------------------------------------------------------------------------------------------------------------------------------------------------------------------------------------------|
| <p>Does mother have a known significant disease? (<i>tick all that apply</i>)</p> <ul style="list-style-type: none"> <li><input type="checkbox"/> None known</li> <li><input type="checkbox"/> Severe anemia</li> <li><input type="checkbox"/> Chronic hypertension</li> <li><input type="checkbox"/> Diabetes mellitus</li> <li><input type="checkbox"/> Other condition, specify: : _____</li> </ul>                                                                                                                                                                                                                                              | <p><i>If yes, ensure appropriate treatment.</i></p>                                                                                                                                                                                                                              |
| <p>Does fetus have any concerning features? (<i>tick all that apply</i>)</p> <ul style="list-style-type: none"> <li><input type="checkbox"/> No</li> <li><input type="checkbox"/> Stillbirth</li> <li><input type="checkbox"/> Malposition (breech, etc.)</li> <li><input type="checkbox"/> Fetal HR &gt; 160 or &lt;110</li> <li><input type="checkbox"/> Multiple pregnancy</li> <li><input type="checkbox"/> Meconium stained fluid</li> <li><input type="checkbox"/> Suspicion for intrauterine growth restriction</li> <li><input type="checkbox"/> Fetal anomaly</li> <li><input type="checkbox"/> Other condition, specify: _____</li> </ul> | <p><i>If yes, prepare for birth with additional staff assistance for delivery.</i></p>                                                                                                                                                                                           |
| <p>Does mother need referral?</p> <ul style="list-style-type: none"> <li><input type="checkbox"/> Yes, organized and contacted</li> <li><input type="checkbox"/> No</li> </ul> <p>Reason for referral: _____</p> <p>Referral location: _____</p> <p>If referral is not possible, note reason here: _____</p>                                                                                                                                                                                                                                                                                                                                        |                                                                                                                                                                                                                                                                                  |
| <p><input type="checkbox"/> Confirm supplies available to clean hands and wear gloves for each vaginal exam.</p>                                                                                                                                                                                                                                                                                                                                                                                                                                                                                                                                    |                                                                                                                                                                                                                                                                                  |
| <p><input type="checkbox"/> Birth companion encouraged to be present at birth.</p>                                                                                                                                                                                                                                                                                                                                                                                                                                                                                                                                                                  |                                                                                                                                                                                                                                                                                  |
| <p><input type="checkbox"/> Counsel mother or companion to call for help if needed.</p>                                                                                                                                                                                                                                                                                                                                                                                                                                                                                                                                                             | <p><i>Call for help if:</i></p> <ul style="list-style-type: none"> <li>• <i>Bleeding</i></li> <li>• <i>severe abdominal pain</i></li> <li>• <i>severe headache</i></li> <li>• <i>visual disturbance</i></li> <li>• <i>urge to push or difficulty emptying bladder</i></li> </ul> |
| <p><input type="checkbox"/> Confirm that mother has a plan for post-partum contraception. Does she want a Long Acting reversible Contraceptive (LARC) method or sterilization immediately post-partum?</p>                                                                                                                                                                                                                                                                                                                                                                                                                                          | <p><i>If yes, determine if an implant or intrauterine device (IUD) is available or confirm plan for sterilization. Prepare for immediate post-partum insertion of the appropriate method or postpartum sterilization.</i></p>                                                    |

| 3 JUST BEFORE PUSHING OR BEFORE CAESAREAN                                                                                                                                                                                                                                                                                                                                             |                                                                                                                                                                                                                                                                                                                                                                                                                        |                     |
|---------------------------------------------------------------------------------------------------------------------------------------------------------------------------------------------------------------------------------------------------------------------------------------------------------------------------------------------------------------------------------------|------------------------------------------------------------------------------------------------------------------------------------------------------------------------------------------------------------------------------------------------------------------------------------------------------------------------------------------------------------------------------------------------------------------------|---------------------|
| Date: _____                                                                                                                                                                                                                                                                                                                                                                           | Time: _____                                                                                                                                                                                                                                                                                                                                                                                                            | Collected by: _____ |
|                                                                                                                                                                                                                                                                                                                                                                                       |                                                                                                                                                                                                                                                                                                                                                                                                                        |                     |
| <input type="checkbox"/> Assistant identified and informed to be ready to help at birth if needed.                                                                                                                                                                                                                                                                                    | <i>Assistance needed if any of the following:</i> <ul style="list-style-type: none"> <li>• Preterm birth</li> <li>• FHR &gt; 160 or &lt; 110</li> <li>• Meconium present</li> <li>• Other anticipated problem for mother or infant</li> </ul>                                                                                                                                                                          |                     |
| Does mother need antibiotics?<br><input type="checkbox"/> Yes, given<br><input type="checkbox"/> No                                                                                                                                                                                                                                                                                   | <i>Give antibiotics:</i> <ul style="list-style-type: none"> <li>• PPROM 28-34 weeks</li> <li>• rupture of membranes after 34weeks &gt; 12 hours</li> <li>• Temperature &gt; 38°C or &gt; 37.5°C axillary</li> <li>• Foul-smelling vaginal discharge</li> <li>• Planned C-section</li> </ul>                                                                                                                            |                     |
| Does mother need magnesium sulfate?<br><input type="checkbox"/> Yes, for pre-eclampsia, given<br><input type="checkbox"/> Yes, for fetal neuroprotection, given<br><input type="checkbox"/> No                                                                                                                                                                                        | <i>Give if:</i> <ul style="list-style-type: none"> <li>• diastolic blood pressure <math>\geq</math> 110 mmHg and 3+ proteinuria</li> <li>• diastolic blood pressure <math>\geq</math> 90 mmHg, 2+ proteinuria AND if any: severe headache, visual disturbance, or epigastric pain</li> </ul> <i>OR for fetal neuroprotection if imminent delivery 28-32 weeks</i>                                                      |                     |
| Does mother need anti-hypertensive treatment?<br><input type="checkbox"/> Yes, given<br><input type="checkbox"/> No                                                                                                                                                                                                                                                                   | <i>Give if systolic blood pressure <math>\geq</math> 160 mmHg</i>                                                                                                                                                                                                                                                                                                                                                      |                     |
| <input type="checkbox"/> Confirm essential supplies at bedside for mother<br><i>Tick box if all are available. Circle any of the following that are missing:</i> <ul style="list-style-type: none"> <li>• Gloves</li> <li>• Soap and clean water or alcohol-based handrub</li> <li>• Oxytocin 10 units in a syringe</li> <li>• Other uterotonic, if oxytocin not available</li> </ul> | <i>Prepare to care for mother immediately after birth:</i> <ol style="list-style-type: none"> <li>1. Exclude 2nd baby</li> <li>2. Give oxytocin within 1 minute, or other uterotonic if oxytocin not available</li> <li>3. Deliver placenta safely according to AMTSL</li> <li>4. Check uterine tone after placenta is delivered</li> <li>5. Confirm uterus is contracted</li> </ol>                                   |                     |
| <input type="checkbox"/> Confirm essential supplies at bedside for baby<br><i>Tick box if all are available. Circle any of the following that are missing:</i> <ul style="list-style-type: none"> <li>• Clean towel</li> <li>• Sterile blade to cut cord</li> <li>• Suction device</li> <li>• Bag and mask</li> </ul>                                                                 | <i>Prepare to care for baby immediately after birth:</i> <ol style="list-style-type: none"> <li>1. Dry and stimulate baby and keep warm</li> <li>2. If not breathing: stimulate and clear airway</li> <li>3. If still not breathing:               <ul style="list-style-type: none"> <li>- cut cord</li> <li>- begin positive pressure ventilation with bag and mask</li> <li>- shout for help</li> </ul> </li> </ol> |                     |
| <input type="checkbox"/> Confirm ready to initiate Kangaroo Care if preterm                                                                                                                                                                                                                                                                                                           |                                                                                                                                                                                                                                                                                                                                                                                                                        |                     |

| <span style="font-size: 24px; font-weight: bold; margin-right: 10px;">4</span> <span style="font-size: 18px; font-weight: bold;">SOON AFTER BIRTH - WITHIN ONE HOUR</span>                                                            |                                  |                                                                                                                                                                                                                                                                                                                                                                                      |                                                                                                                                         |
|---------------------------------------------------------------------------------------------------------------------------------------------------------------------------------------------------------------------------------------|----------------------------------|--------------------------------------------------------------------------------------------------------------------------------------------------------------------------------------------------------------------------------------------------------------------------------------------------------------------------------------------------------------------------------------|-----------------------------------------------------------------------------------------------------------------------------------------|
| Date: _____                                                                                                                                                                                                                           |                                  | Time: _____                                                                                                                                                                                                                                                                                                                                                                          | Collected by: _____                                                                                                                     |
| Delivery mode: <ul style="list-style-type: none"> <li><input type="checkbox"/> Vaginal delivery</li> <li><input type="checkbox"/> Operative vaginal delivery</li> <li><input type="checkbox"/> Caesarean</li> </ul>                   |                                  | Labor mode: <ul style="list-style-type: none"> <li><input type="checkbox"/> Induced</li> <li><input type="checkbox"/> Spontaneous</li> </ul>                                                                                                                                                                                                                                         |                                                                                                                                         |
| Multiple gestation? <ul style="list-style-type: none"> <li><input type="checkbox"/> Yes</li> <li><input type="checkbox"/> No</li> </ul> <i>If yes, specify information for each baby.</i>                                             | Infant date/time of birth: _____ | Infant weight at birth: _____                                                                                                                                                                                                                                                                                                                                                        | Infant gender: <ul style="list-style-type: none"> <li><input type="checkbox"/> Male</li> <li><input type="checkbox"/> Female</li> </ul> |
| <input type="checkbox"/> Alive<br><input type="checkbox"/> Fresh stillbirth<br><input type="checkbox"/> Macerated stillbirth<br><input type="checkbox"/> Early neonatal death                                                         |                                  | <i>If infant dies, offer emotional support services to mother.</i>                                                                                                                                                                                                                                                                                                                   |                                                                                                                                         |
| Is mother bleeding too much?<br><input type="checkbox"/> Yes, <b>shout for help</b><br><input type="checkbox"/> No                                                                                                                    |                                  | <i>If bleeding abnormally:</i> <ul style="list-style-type: none"> <li>• Massage uterus after placenta is delivered</li> <li>• Consider additional uterotonic</li> <li>• Start intravenous line</li> <li>• Look for lacerations, examine placenta, and keep mother warm</li> <li>• Treat cause</li> <li>• Take blood for grouping and cross match</li> </ul>                          |                                                                                                                                         |
| Does baby have any concerning features? <i>(check all that apply)</i><br><input type="checkbox"/> No<br><input type="checkbox"/> Fetal anomaly<br><input type="checkbox"/> Size <2500g<br><input type="checkbox"/> Signs of infection |                                  | <input type="checkbox"/> Signs of respiratory distress<br><input type="checkbox"/> Signs of anemia<br><input type="checkbox"/> Signs of birth asphyxia<br><input type="checkbox"/> Other condition, specify: _____                                                                                                                                                                   |                                                                                                                                         |
| Does mother need antibiotics?<br><input type="checkbox"/> Yes, given<br><input type="checkbox"/> No                                                                                                                                   |                                  | <i>Give antibiotics if any of the following:</i> <ul style="list-style-type: none"> <li>• Placental manually removed</li> <li>• Mother's temperature &gt; 38°C or &gt; 37.5°C axillary AND chills or foul-smelling vaginal discharge</li> <li>• 3<sup>rd</sup> degree tear</li> <li>• Assisted delivery</li> <li>• C-section</li> <li>• PROM&lt;12 hours/PPROM 28-34weeks</li> </ul> |                                                                                                                                         |
| Does mother need magnesium sulfate for pre-eclampsia?<br><input type="checkbox"/> Yes, given<br><input type="checkbox"/> No                                                                                                           |                                  | <i>Give if any of:</i> <ul style="list-style-type: none"> <li>• diastolic blood pressure ≥ 110 mmHg and 3+ proteinuria</li> <li>• diastolic blood pressure ≥ 90 mmHg, 2+ proteinuria AND if any: severe headache, visual disturbance, or epigastric pain</li> </ul>                                                                                                                  |                                                                                                                                         |
| Does mother need anti-hypertensive treatment?<br><input type="checkbox"/> Yes, given<br><input type="checkbox"/> No                                                                                                                   |                                  | <i>Give if systolic blood pressure ≥ 160 mmHg</i>                                                                                                                                                                                                                                                                                                                                    |                                                                                                                                         |
| Does baby need referral?<br><input type="checkbox"/> Yes<br><input type="checkbox"/> No<br>Reason for referral: _____<br>Referral location: _____<br>If referral is not possible, note reason here: _____                             |                                  | <i>If yes, follow your facility's protocol for referral.</i>                                                                                                                                                                                                                                                                                                                         |                                                                                                                                         |

**SAFE CHILDBIRTH CHECKLIST AND CASE SHEET**

**Unique identifier :** \_\_\_\_\_

|                                                                                                                                                                                                                                             |                                                                                                                                                                                                                                                                                                                                                                                     |                                                                                                                                                                                                                                                                                                                                                                                                                                                                       |
|---------------------------------------------------------------------------------------------------------------------------------------------------------------------------------------------------------------------------------------------|-------------------------------------------------------------------------------------------------------------------------------------------------------------------------------------------------------------------------------------------------------------------------------------------------------------------------------------------------------------------------------------|-----------------------------------------------------------------------------------------------------------------------------------------------------------------------------------------------------------------------------------------------------------------------------------------------------------------------------------------------------------------------------------------------------------------------------------------------------------------------|
| <p>Gestational age: _____ If indicated: _____<br/> <input type="checkbox"/> GA by LNMP _____ GA by Ballard _____<br/> <input type="checkbox"/> Weight _____gms</p>                                                                          | <p><i>If below 37 weeks, initiate preterm care (i.e., resuscitation with PPV, Kangaroo Care, referral) if needed.</i></p> <p><i>If baby &lt;2500 gms OR &lt;37 weeks, do Ballard exam to confirm gestational age</i></p>                                                                                                                                                            |                                                                                                                                                                                                                                                                                                                                                                                                                                                                       |
| <p>Does baby need: <i>(tick all that apply)</i></p> <p><input type="checkbox"/> Special care and monitoring<br/> <input type="checkbox"/> Antiretrovirals<br/> <input type="checkbox"/> Antibiotics</p>                                     | <p><i>Arrange special care and monitoring if:</i></p> <ul style="list-style-type: none"> <li>• <i>born more than 1 month early</i></li> <li>• <i>has birth weight &lt;2500 grams</i></li> <li>• <i>needs antibiotics</i></li> <li>• <i>required resuscitation</i></li> <li>• <i>baby has danger sign</i></li> </ul> <p><i>Give antiretrovirals if mother is HIV+.</i></p>           | <p><i>Give antibiotics if:</i></p> <ul style="list-style-type: none"> <li>• <i>antibiotics were given to mother</i></li> <li>• <i>baby has signs of breathing too fast (&gt;60 breaths min) or too slow (&lt;30 breaths min)</i></li> <li>• <i>Chest in-drawing, grunting or convulsions</i></li> <li>• <i>No movement on stimulation</i></li> <li>• <i>Baby's temperature is too cold (&lt; 35°C and not rising after warming) or too hot (&gt; 38°C)</i></li> </ul> |
| <p>Breastfeeding and skin-to-skin initiated?</p> <p><input type="checkbox"/> Yes, immediately or within one hour after birth<br/> <input type="checkbox"/> Yes, more than one hour after birth<br/> <input type="checkbox"/> No</p>         | <p><i>Consider supplemental feeding if baby unable to breastfeed.</i></p>                                                                                                                                                                                                                                                                                                           |                                                                                                                                                                                                                                                                                                                                                                                                                                                                       |
| <p>Does baby need Kangaroo care?</p> <p><input type="checkbox"/> Yes, initiated immediately or within one hour after birth<br/> <input type="checkbox"/> Yes, initiated more than one hour after birth<br/> <input type="checkbox"/> No</p> | <p><i>Consider for preterm or low birth weight baby.</i></p>                                                                                                                                                                                                                                                                                                                        |                                                                                                                                                                                                                                                                                                                                                                                                                                                                       |
|                                                                                                                                                                                                                                             |                                                                                                                                                                                                                                                                                                                                                                                     |                                                                                                                                                                                                                                                                                                                                                                                                                                                                       |
| <p><input type="checkbox"/> Counsel mother or companion to call for help if danger signs are present.</p>                                                                                                                                   | <p><i>Mother has any of the following:</i></p> <ul style="list-style-type: none"> <li>• <i>bleeding</i></li> <li>• <i>severe abdominal pain</i></li> <li>• <i>severe headache</i></li> <li>• <i>visual disturbance</i></li> <li>• <i>breathing difficulty</i></li> <li>• <i>fever chills</i></li> <li>• <i>difficulty emptying bladder</i></li> <li>• <i>convulsions</i></li> </ul> | <p><i>Baby has any of the following:</i></p> <ul style="list-style-type: none"> <li>• <i>fast or difficulty breathing</i></li> <li>• <i>fever</i></li> <li>• <i>unusually cold</i></li> <li>• <i>stops feeding well</i></li> <li>• <i>less activity than normal</i></li> <li>• <i>whole body becomes yellow</i></li> <li>• <i>convulsions</i></li> </ul>                                                                                                              |
| <p>Does mother want Long Acting reversible Contraceptive (LARC) method or sterilization immediately post-partum?</p> <p><input type="checkbox"/> Yes<br/> <input type="checkbox"/> No</p>                                                   | <p><i>Confirm that mother has a plan for post-partum contraception. If mother wants LARC, determine if an implant or intrauterine device (IUD) is available. Prepare for immediate post-partum insertion of the appropriate method. If wants sterilization, confirm plan and availability of this service.</i></p>                                                                  |                                                                                                                                                                                                                                                                                                                                                                                                                                                                       |

| <span style="font-size: 24px; font-weight: bold; margin-right: 10px;">5</span> <span style="font-size: 18px; font-weight: bold;">BEFORE DISCHARGE</span>                                                                                                                                                                                                                                                                                                                                  |                                                                                                                                                                                                                                                                                                                      |                                                                                                                                                                                                                                                                                                                                                                                                                                                                                                                                                                                                                                                                                                                                                                                                                                      |                                                                                                                                                                                                                                                                                                                                          |                                                                                                                                                                                                                                                                                                                      |
|-------------------------------------------------------------------------------------------------------------------------------------------------------------------------------------------------------------------------------------------------------------------------------------------------------------------------------------------------------------------------------------------------------------------------------------------------------------------------------------------|----------------------------------------------------------------------------------------------------------------------------------------------------------------------------------------------------------------------------------------------------------------------------------------------------------------------|--------------------------------------------------------------------------------------------------------------------------------------------------------------------------------------------------------------------------------------------------------------------------------------------------------------------------------------------------------------------------------------------------------------------------------------------------------------------------------------------------------------------------------------------------------------------------------------------------------------------------------------------------------------------------------------------------------------------------------------------------------------------------------------------------------------------------------------|------------------------------------------------------------------------------------------------------------------------------------------------------------------------------------------------------------------------------------------------------------------------------------------------------------------------------------------|----------------------------------------------------------------------------------------------------------------------------------------------------------------------------------------------------------------------------------------------------------------------------------------------------------------------|
| Date: _____                                                                                                                                                                                                                                                                                                                                                                                                                                                                               | Time: _____                                                                                                                                                                                                                                                                                                          | Collected by: _____                                                                                                                                                                                                                                                                                                                                                                                                                                                                                                                                                                                                                                                                                                                                                                                                                  |                                                                                                                                                                                                                                                                                                                                          |                                                                                                                                                                                                                                                                                                                      |
| Infant disposition/status at discharge?<br><input type="checkbox"/> Alive, discharged home<br><input type="checkbox"/> Stillbirth<br><input type="checkbox"/> Early neonatal death<br><input type="checkbox"/> Referred to another facility : _____                                                                                                                                                                                                                                       |                                                                                                                                                                                                                                                                                                                      | <p><i>If infant dies, offer emotional support services to mother.</i></p> <p><i>If multiple gestation, specify for each baby.</i></p>                                                                                                                                                                                                                                                                                                                                                                                                                                                                                                                                                                                                                                                                                                |                                                                                                                                                                                                                                                                                                                                          |                                                                                                                                                                                                                                                                                                                      |
| Does mother have concerning features?<br><input type="checkbox"/> Bleeding too much<br><input type="checkbox"/> Needs antibiotics<br><input type="checkbox"/> Elevated blood pressure (>140/90)<br><input type="checkbox"/> Other: _____<br><input type="checkbox"/> None                                                                                                                                                                                                                 |                                                                                                                                                                                                                                                                                                                      | <p><i>If pulse &gt;110 beats/minute and systolic blood pressure &lt;90mmHg.</i></p> <ul style="list-style-type: none"> <li>• Start IV</li> <li>• Keep mother warm</li> <li>• Consider blood transfusion</li> <li>• Treat cause</li> </ul> <p><i>Give antibiotics to mother if any of the following:</i></p> <ul style="list-style-type: none"> <li>• Mother's temperature &gt; 38°C or &gt; 37.5°C axillary</li> <li>• Foul-smelling vaginal discharge</li> <li>• Chills</li> </ul> <p><i>IF YES to any, treat and delay discharge</i></p>                                                                                                                                                                                                                                                                                           |                                                                                                                                                                                                                                                                                                                                          |                                                                                                                                                                                                                                                                                                                      |
| Does baby have concerning features?<br><input type="checkbox"/> Needs antibiotics<br><input type="checkbox"/> Not feeding well<br><input type="checkbox"/> Needs Kangaroo Care<br><input type="checkbox"/> None                                                                                                                                                                                                                                                                           |                                                                                                                                                                                                                                                                                                                      | <p><i>Give antibiotics to baby if any of the following:</i></p> <ul style="list-style-type: none"> <li>• baby has signs of breathing too fast (&gt;60 breaths/min) or too slow (&lt;30 breaths/min)</li> <li>• Chest in-drawing, grunting or convulsions</li> <li>• No movement on stimulation</li> <li>• Baby's temperature is too cold (&lt; 35°C and not rising after warming) or too hot (&gt; 38°C)</li> <li>• Stopped breastfeeding well</li> <li>• Umbilical redness extending to skin or draining pus</li> </ul> <p><i>If baby feeding well, emphasize exclusive breastfeeding. If not, reconsider discharge plan and consider supplemental feeding.</i></p> <p><i>Consider Kangaroo Care for preterm or low birth weight baby and recommend close follow up or delay discharge</i></p>                                      |                                                                                                                                                                                                                                                                                                                                          |                                                                                                                                                                                                                                                                                                                      |
| Family planning options discussed and offered to mother?<br><input type="checkbox"/> Yes, implant given<br><input type="checkbox"/> Yes, IUD given<br><input type="checkbox"/> Yes, Depo given<br><input type="checkbox"/> Yes, pills given<br><input type="checkbox"/> Yes, sterilization done<br><input type="checkbox"/> Not discussed<br><input type="checkbox"/> Discussed but not offered prior to discharge<br><input type="checkbox"/> Discussed and offered, but mother declined |                                                                                                                                                                                                                                                                                                                      | <ul style="list-style-type: none"> <li>• <i>If implant or IUD desired, place now and make follow-up plan.</i></li> <li>• <i>If Depo desired, give injection now and discuss follow-up schedule.</i></li> <li>• <i>If pills desired, give now and discuss follow-up plan.</i></li> </ul>                                                                                                                                                                                                                                                                                                                                                                                                                                                                                                                                              |                                                                                                                                                                                                                                                                                                                                          |                                                                                                                                                                                                                                                                                                                      |
| <input type="checkbox"/> Arrange follow-up for mother and baby and counsel mother and companion to call for help after discharge if danger signs appear after discharge:                                                                                                                                                                                                                                                                                                                  |                                                                                                                                                                                                                                                                                                                      | <table style="width: 100%; border: none;"> <tr> <td style="width: 50%; vertical-align: top;"> <p><i>Mother has any of the following danger signs:</i></p> <ul style="list-style-type: none"> <li>• Bleeding</li> <li>• severe abdominal pain</li> <li>• severe headache</li> <li>• visual disturbance</li> <li>• breathing difficulty</li> <li>• fever chills</li> <li>• difficulty emptying bladder</li> <li>• convulsions</li> </ul> </td> <td style="width: 50%; vertical-align: top;"> <p><i>Baby has any of the following danger signs:</i></p> <ul style="list-style-type: none"> <li>• fast or difficulty breathing</li> <li>• fever</li> <li>• unusually cold</li> <li>• stops feeding well</li> <li>• less activity than normal</li> <li>• whole body becomes yellow</li> <li>• convulsions</li> </ul> </td> </tr> </table> | <p><i>Mother has any of the following danger signs:</i></p> <ul style="list-style-type: none"> <li>• Bleeding</li> <li>• severe abdominal pain</li> <li>• severe headache</li> <li>• visual disturbance</li> <li>• breathing difficulty</li> <li>• fever chills</li> <li>• difficulty emptying bladder</li> <li>• convulsions</li> </ul> | <p><i>Baby has any of the following danger signs:</i></p> <ul style="list-style-type: none"> <li>• fast or difficulty breathing</li> <li>• fever</li> <li>• unusually cold</li> <li>• stops feeding well</li> <li>• less activity than normal</li> <li>• whole body becomes yellow</li> <li>• convulsions</li> </ul> |
| <p><i>Mother has any of the following danger signs:</i></p> <ul style="list-style-type: none"> <li>• Bleeding</li> <li>• severe abdominal pain</li> <li>• severe headache</li> <li>• visual disturbance</li> <li>• breathing difficulty</li> <li>• fever chills</li> <li>• difficulty emptying bladder</li> <li>• convulsions</li> </ul>                                                                                                                                                  | <p><i>Baby has any of the following danger signs:</i></p> <ul style="list-style-type: none"> <li>• fast or difficulty breathing</li> <li>• fever</li> <li>• unusually cold</li> <li>• stops feeding well</li> <li>• less activity than normal</li> <li>• whole body becomes yellow</li> <li>• convulsions</li> </ul> |                                                                                                                                                                                                                                                                                                                                                                                                                                                                                                                                                                                                                                                                                                                                                                                                                                      |                                                                                                                                                                                                                                                                                                                                          |                                                                                                                                                                                                                                                                                                                      |
