# Supplementary material for: Implementing the WHO Safe Childbirth Checklist modified for preterm birth: lessons learned and experiences from Kenya and Uganda
Source: Springer Nature journal article supplement (doi:10.1186/s12913-022-07650-x), 2022-03-03

# Additional File 4: Study timeline and roll-out of intervention components

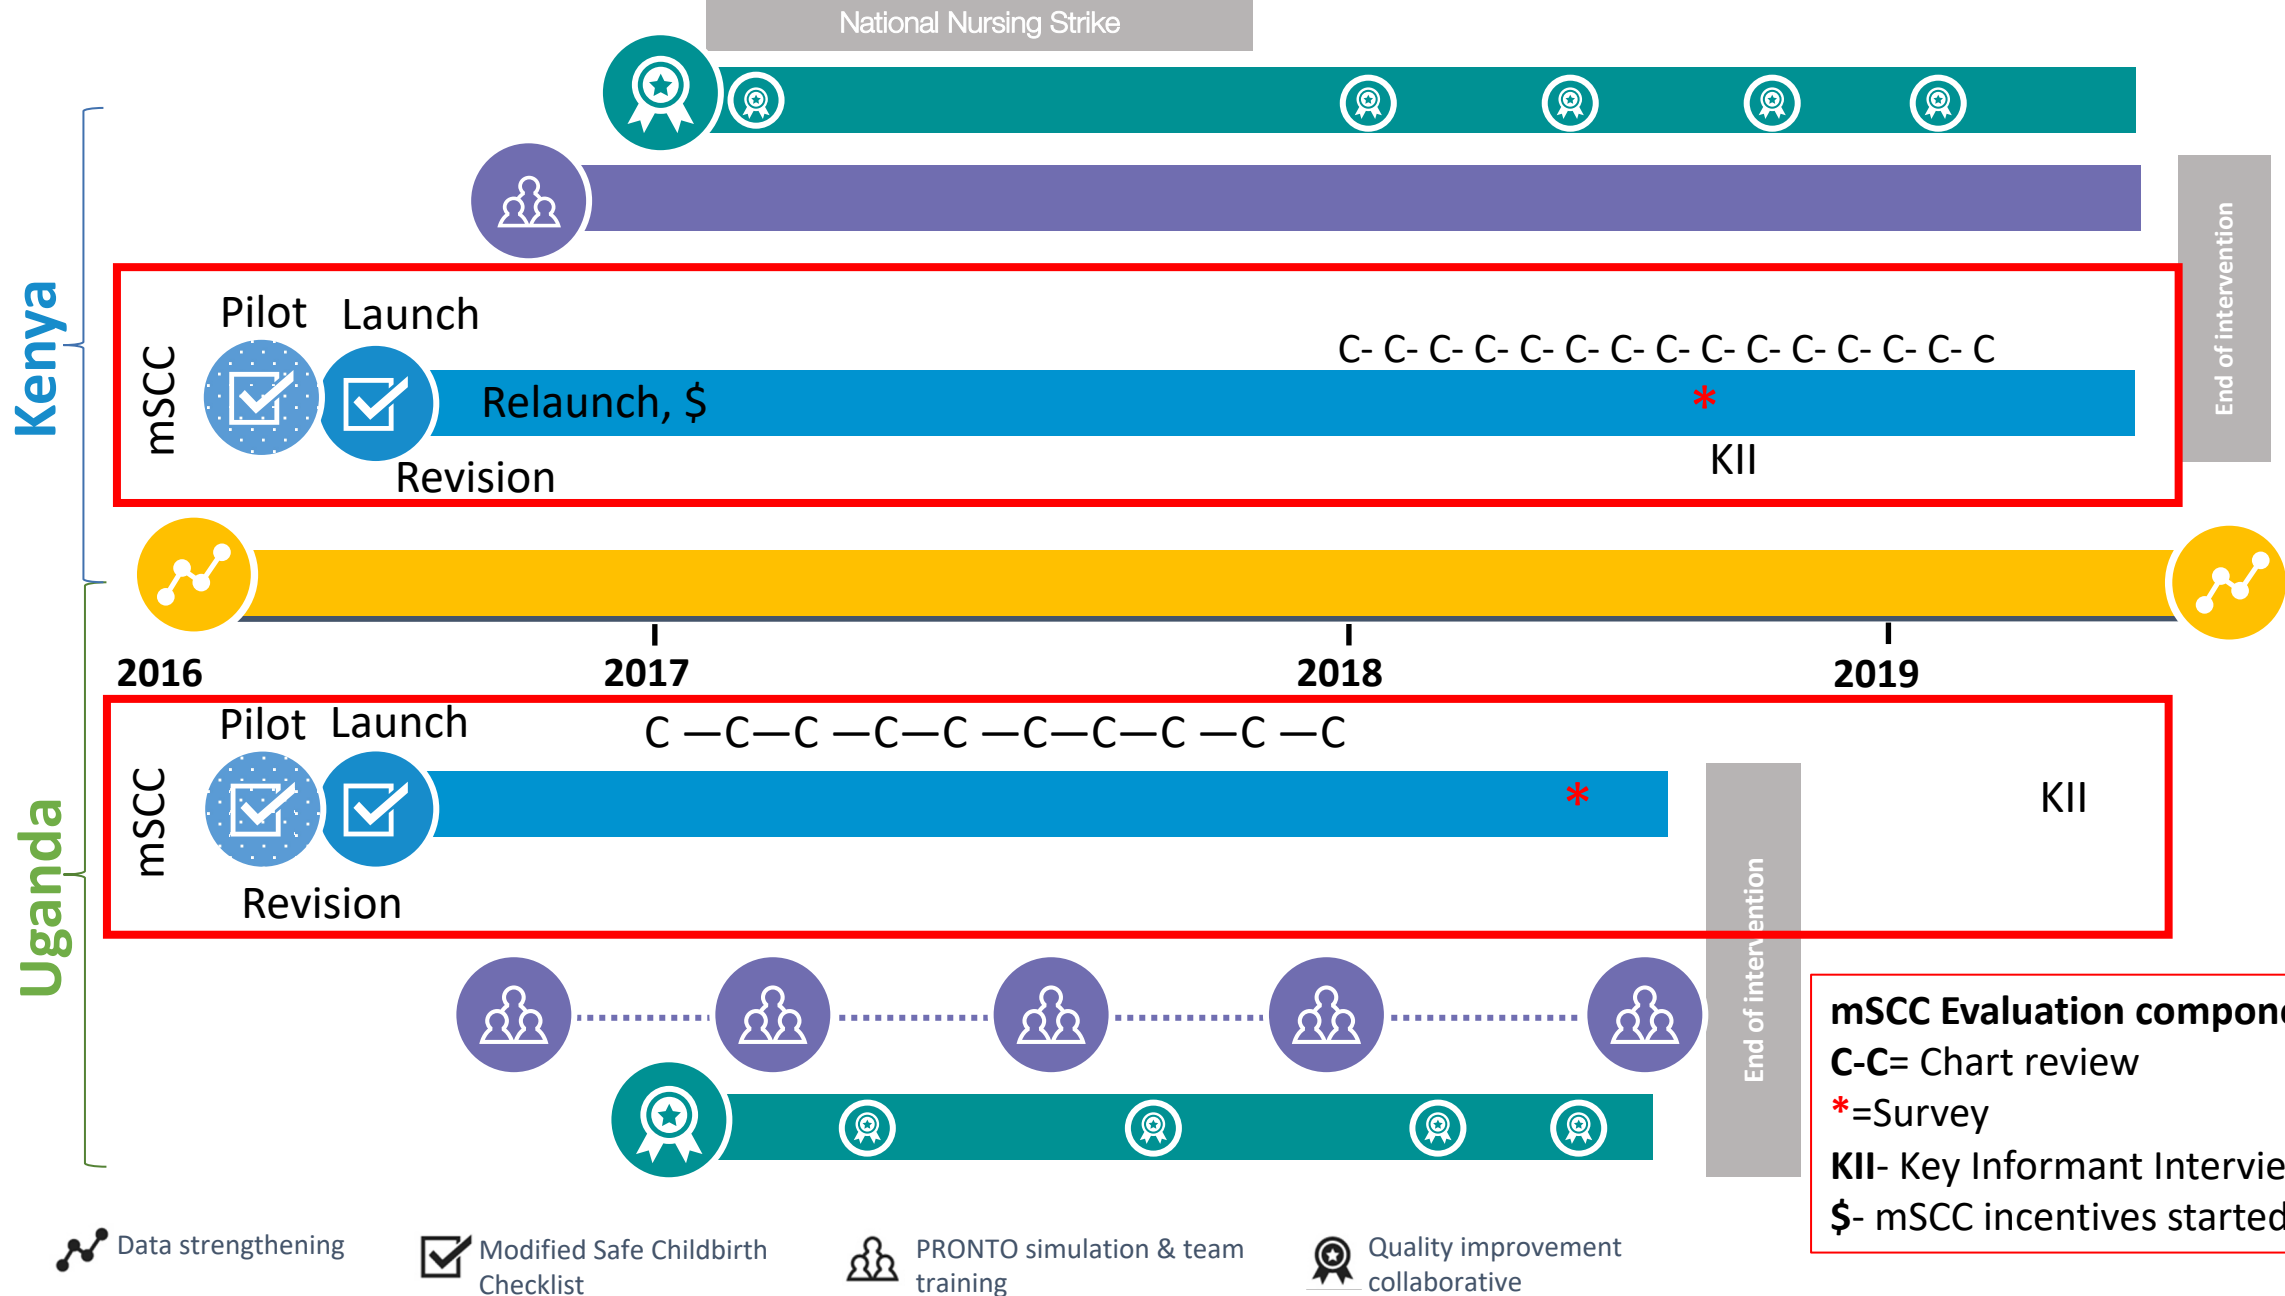

Supplement: MOESM4 [file 20189392]
