# Supplementary material for: Implementing the WHO Safe Childbirth Checklist modified for preterm birth: lessons learned and experiences from Kenya and Uganda
Source: Springer Nature journal article supplement (doi:10.1186/s12913-022-07650-x), 2022-03-03
Supplement: MOESM6 [file 20189392]

**PTBI - K PROJECT: KEMRI/UCSF/MIGORI COUNTY  
APPENDIX 7: PROCESS EVALUATION INTERVIEW GUIDES**

**INTERVIEW GUIDE – HEALTH WORKERS**

|                                                                                                                                                                          |                                                                                                                                                                                                                                                                                                                                                                                                                                                                                                                                                                                                                                                                                                                        |
|--------------------------------------------------------------------------------------------------------------------------------------------------------------------------|------------------------------------------------------------------------------------------------------------------------------------------------------------------------------------------------------------------------------------------------------------------------------------------------------------------------------------------------------------------------------------------------------------------------------------------------------------------------------------------------------------------------------------------------------------------------------------------------------------------------------------------------------------------------------------------------------------------------|
| <p><i>Ice-breaking, Warm up &amp; Messaging</i></p> <ul style="list-style-type: none"> <li>▪ <i>General Newborn Care</i></li> <li>▪ <i>Care for Pre-terms</i></li> </ul> | <p>Ask &amp; NOTE <b>respondent biodata:</b></p> <ul style="list-style-type: none"> <li>- Respondent Name, Age, Gender, Religion, Ethnicity</li> <li>- Facility Name, Position/ role, Length or duration of work</li> </ul> <p>How would you describe the state of newborn health at your facility? In this region?<br/>Can you please take me through what is normally done for high-risk mothers and babies? <i>Probe for pre-during-after childbirth, reference to HRB guidelines,etc</i><br/>What kind of care is given for pre-term babies? Probe for both hospital care &amp; home care<br/>Who do you work with mostly in newborn care? <i>Probe internal &amp; external support systems + what exactly</i></p> |
| <p><i>Knowledge and management of preterms and newborns</i></p>                                                                                                          | <p>What is your experience with pre-term babies? <i>Probe for confidence levels of PTB management</i><br/>How does your facility deal with pre-term babies?<br/>What do you know about the management of pre-term babies? <i>Probe for knowledge sources – who trained, how useful &amp; how comprehensive – all NC elements)</i><br/>How do you determine that a pre-term baby is ready for discharge?<br/>What usually happens after discharge of a pre-term baby? <i>Probe for hospital systems + any follow-up mechanisms</i><br/><i>What do you think explains the high death rates of pre-terms after discharge?</i><br/><i>What do you think can be done to reduce this?</i></p>                                |
| <p><i>Service User (community) KAP</i></p>                                                                                                                               | <p>What does the community know and think about pre-term babies?<br/>How do you /they handle them while at the hospital?<br/>What happens when they leave the hospital (<i>Probe for issues around care after discharge, ask for case studies, any follow up cases,etc</i>)</p>                                                                                                                                                                                                                                                                                                                                                                                                                                        |
| <p><b>PTBi Intervention Components</b></p> <ul style="list-style-type: none"> <li>▪ <i>Training &amp; Mentorship</i></li> </ul>                                          | <p>What do you know about PTBi? How did you get to know about it? <i>Probe project knowledge + how it was introduced to them</i><br/>Can you help me draw a scenario of pre-term baby care before and after the PTBi project started?<br/>How has PTBi worked with you and/or your facility on care for pre-term babies?<br/>What do you think of the project? <i>Probe for the good, bad &amp; ugly + why</i><br/>How confident do you feel about managing pre-term babies after PTBi?<br/><br/>What do you know about PTBi mentorship?<br/>How does it happen? Probe for modalities, frequency</p>                                                                                                                   |

**PTBI - K PROJECT: KEMRI/UCSF/MIGORI COUNTY  
APPENDIX 7: PROCESS EVALUATION INTERVIEW GUIDES**

|                                                         |                                                                                                                                                                                                                                                                                                                                                                                                                                                                                                                                                                                                                                                                                                                                                                |
|---------------------------------------------------------|----------------------------------------------------------------------------------------------------------------------------------------------------------------------------------------------------------------------------------------------------------------------------------------------------------------------------------------------------------------------------------------------------------------------------------------------------------------------------------------------------------------------------------------------------------------------------------------------------------------------------------------------------------------------------------------------------------------------------------------------------------------|
|                                                         | <p>What exactly do the mentors do? And healthworkers?<br/>         What are your own experiences with regard to training &amp; mentorship?<br/>         What do you think about the usefulness of this approach? <i>Probe for reservations if any &amp; why</i><br/>         Can you give me some examples of when you think mentorship was useful? Why<br/>         What is working well in the training &amp; mentorship process that you think should continue &amp; be strengthened?<br/>         In your opinion, what is not working well that could be improved?</p>                                                                                                                                                                                    |
| <p><i>PRONTO</i></p>                                    | <p>What do you know about PRONTO?<br/>         How exactly does it happen?<br/>         How is this training similar or different from other trainings? How does PRONTO training fit within our context?<br/>         What knowledge and/or skills have you or your colleagues learned from PRONTO? <i>Ask for example/case study of how they've used PRONTO knowledge/skills.</i><br/>         Tell me what you remember about Module 1 and 2 trainings.<br/>         How do you compare them with the PRONTO mentoring visits? How is each one of them useful? Which do you prefer &amp; why?<br/>         What worked for you? Highlights &amp; experiences from PRONTO?<br/>         In your opinion, what is not working well that could be improved?</p> |
| <p><i>Modified Safe Childbirth Checklist (mSCC)</i></p> | <p>What do you know about the mSCC? <i>Probe for how it was introduced &amp; how staff felt about it</i><br/>         How do you [or your colleagues] use the checklist? <i>Probe for effect on work/practice, issues of compliance, etc</i><br/>         What are your [honest] views about it and its use? <i>Probe for what's liked &amp; disliked about it, perceived usefulness</i><br/>         What support systems [if any] exist to ensure mSCC use? <i>Probe for whether they feel supported, by who, how, etc</i><br/>         How can the checklist be made more useful and easy to implement?<br/>         Is there anything else you'd like to say about the checklist?</p>                                                                      |
| <p><i>Quality Improvement (QI)</i></p>                  | <p>What do you know about QI?<br/>         What exactly happens during QI sessions?<br/>         What are your experiences in the learning sessions? What about at the facilities?<br/>         – probe for highlights especially &amp; perceived usefulness<br/>         I am aware of the different QI activities/ projects, including PTBi – how do you deal with this? <i>Probe coping strategies, effects on work, etc?</i><br/>         What have been the implementation challenges of QI?<br/>         Apart from QI how do you generally use the different interventions – do they complement each other or not?</p>                                                                                                                                  |

**PTBI - K PROJECT: KEMRI/UCSF/MIGORI COUNTY  
APPENDIX 7: PROCESS EVALUATION INTERVIEW GUIDES**

|                                                                                     |                                                                                                                                                                                                                                                                                                                                                                                                                                                                                                                                                                                                                                                                                                                                                                                                                                                                            |
|-------------------------------------------------------------------------------------|----------------------------------------------------------------------------------------------------------------------------------------------------------------------------------------------------------------------------------------------------------------------------------------------------------------------------------------------------------------------------------------------------------------------------------------------------------------------------------------------------------------------------------------------------------------------------------------------------------------------------------------------------------------------------------------------------------------------------------------------------------------------------------------------------------------------------------------------------------------------------|
| <p><i>Data Strengthening (DS)</i></p>                                               | <p>How does data strengthening relate to your day-to-day work?<br/>         What do you know about project’s DS process? How exactly did it happen, what was done, when and what similarities or differences did you note? Who did what? <i>Probe input from study team &amp; providers or other staff</i><br/>         Please tell me what you know about prematurity. What about PTB related variables – how has this changed?<br/>         How do healthworkers use data from QI and elsewhere? What do they use it for?<br/>         What do you think about the facility reports? How are they being used &amp; what else would you like to see?<br/>         What are your experiences with data strengthening – probe implementation successes &amp; challenges<br/>         Has there been any success with integration to district and national data systems?</p> |
| <p><i>Impact<br/>Sustainability<br/>Spillovers /Unintended<br/>Consequences</i></p> | <p>What do you think are PTBi’s project success? What explains this success? <i>Probe for areas of consolidation</i><br/>         What about the project challenges overall? What challenges came up generally and how were they addressed?<br/>         What do you think are the project’s weaknesses – what should be improved?<br/>         What are your thoughts in regarding to the continuity of these interventions? <i>Probe for sustainability ideas</i><br/> <i>Is there anything – either good or bad – that was not intended but has happened as a result of PTBi? Probe what, how, why</i><br/>         In your opinion what can we learn from the PTBi experience?</p>                                                                                                                                                                                     |
| <p><i>Wrap up</i></p>                                                               | <ul style="list-style-type: none"> <li>As we conclude, is there anything else you’d like to tell us in regards to what we’ve just discussed? Anything that you think would be useful for this evaluation or for preterm/newborn care?</li> </ul> <p align="center"><b>THANK YOU</b></p>                                                                                                                                                                                                                                                                                                                                                                                                                                                                                                                                                                                    |

**PTBI - K PROJECT: KEMRI/UCSF/MIGORI COUNTY  
APPENDIX 7: PROCESS EVALUATION INTERVIEW GUIDES**

| <b>INTERVIEW GUIDE – HOSPITAL MANAGER - clinical</b>    |                                                                                                                                                                                                                                                                                                                                                                                                                                                                                                                                                                                                                                                                                                                                                                                                                                                                                                                                                                                                                                                                                                                                                                                                                                                                            |
|---------------------------------------------------------|----------------------------------------------------------------------------------------------------------------------------------------------------------------------------------------------------------------------------------------------------------------------------------------------------------------------------------------------------------------------------------------------------------------------------------------------------------------------------------------------------------------------------------------------------------------------------------------------------------------------------------------------------------------------------------------------------------------------------------------------------------------------------------------------------------------------------------------------------------------------------------------------------------------------------------------------------------------------------------------------------------------------------------------------------------------------------------------------------------------------------------------------------------------------------------------------------------------------------------------------------------------------------|
| <i>Intros &amp; Background</i>                          | <p>Bio data:</p> <ul style="list-style-type: none"> <li>- Name, Gender, Qualifications, Position/ role</li> <li>- Facility Name, Length or duration of work</li> </ul>                                                                                                                                                                                                                                                                                                                                                                                                                                                                                                                                                                                                                                                                                                                                                                                                                                                                                                                                                                                                                                                                                                     |
| <i>Knowledge and management of preterm and newborns</i> | <p>What is the experience of this hospital with pre-term babies? <i>Probe for numbers &amp; related outcomes</i><br/>           As a hospital, how prepared and equipped do you feel in handling pre-term babies?<br/>           How is care for newborns organised at this facility? How do your staff deal with pre-term babies? <i>Probe for issues around ALL health system blocks – medicines, vaccines &amp; equipment, staffing, financing, HMIS data systems, etc</i><br/>           What systems and measure are in place here to ensure the survival of newborns in general &amp; preterms in particular? <i>Probe neonatal units/corners &amp; functionality, HW skills, issues around skilled HW rotation on wards, etc</i></p> <p>A lot has been said about high mortality among PTB after discharge, what is the experience of this hospital?<br/>           What do you think explains the high death rates of pre-terms after discharge?<br/>           What do you think can be done to reduce this?<br/>           How do you [or your staff] determine that a pre-term baby is ready for discharge?<br/>           What usually happens before and after discharge of a pre-term baby? <i>Probe for hospital systems + any follow-up mechanisms</i></p> |
| <i>Service User (community) KAP</i>                     | <p>What does the community know and think about pre-term babies?<br/>           How do you they handle them while at the hospital?<br/>           What happens when they leave the hospital (<i>Probe for issues around care after discharge, ask for case studies, any follow up cases, etc</i>)</p>                                                                                                                                                                                                                                                                                                                                                                                                                                                                                                                                                                                                                                                                                                                                                                                                                                                                                                                                                                      |
| <i>PTBi</i>                                             | <p>What do you know about the project called PTBi? <i>Probe project knowledge, source + how it was introduced, level of consultation, etc</i><br/>           How has PTBi worked with you and/or your facility?<br/>           Generally what do you think of the project? <i>Probe for the good, bad &amp; ugly + why</i></p>                                                                                                                                                                                                                                                                                                                                                                                                                                                                                                                                                                                                                                                                                                                                                                                                                                                                                                                                             |
| <i>PRONTO</i>                                           | <p><b>PTBi has 4 main components in its intervention, and I'd like to hear your views and/or experience on each</b><br/>           What do you know about PRONTO training for providers? <i>Explain each component if manager doesn't know &amp; then ask</i><br/>           What do you think of the method of training, especially within our context?<br/>           How has it helped your staff?<br/>           What do you think of its usefulness? Feasibility? Continuity?</p>                                                                                                                                                                                                                                                                                                                                                                                                                                                                                                                                                                                                                                                                                                                                                                                     |

**PTBI - K PROJECT: KEMRI/UCSF/MIGORI COUNTY  
APPENDIX 7: PROCESS EVALUATION INTERVIEW GUIDES**

|                                                                       |                                                                                                                                                                                                                                                                                                                                                                                                                                                                                                                                                                                                                                                                                                                                                                                                                            |
|-----------------------------------------------------------------------|----------------------------------------------------------------------------------------------------------------------------------------------------------------------------------------------------------------------------------------------------------------------------------------------------------------------------------------------------------------------------------------------------------------------------------------------------------------------------------------------------------------------------------------------------------------------------------------------------------------------------------------------------------------------------------------------------------------------------------------------------------------------------------------------------------------------------|
| <i>Modified Safe<br/>Childbirth<br/>Checklist<br/>(mSCC)</i>          | <p>What do you know about the mSCC?<br/>How has it been operationalized at your facility?<br/>What are your [honest] views about it and its use? <i>Probe for what's liked &amp; disliked about it, perceived usefulness</i><br/>What support systems [if any] exist to ensure mSCC use? <i>Probe for whether hospital feels supported, by who, how, etc</i><br/>How can the checklist be made more useful and easy to implement?<br/>Is there anything else you'd like to say about the checklist?</p>                                                                                                                                                                                                                                                                                                                    |
| <i>Quality<br/>Improvement (QI)<br/>Training &amp;<br/>Mentorship</i> | <p>What do you know about QI training &amp; mentorships?<br/>What are the experiences of you and/or your staff with QI? in the learning sessions?<br/>I am aware of the different QI activities/ projects, including PTBi – how do you deal with this? <i>Probe coping strategies, effects on work, etc?</i><br/>What have been the implementation challenges of QI/ mentorship &amp; training<br/>Apart from QI how do you generally use the different interventions – how do they complement each other?</p>                                                                                                                                                                                                                                                                                                             |
| <i>Data Strengthening<br/>(DS)</i>                                    | <p>What systems or structures does this hospital have in place for data? How do you they work?<br/>How do your staff use data systems (e.g. for QI) in their daily practice? What do they use it for?<br/>What about management – does this data feed into management &amp; policy decisions? If yes, how? If no, why?<br/>What do you think about the facility reports? How are they being used &amp; what else would you like to see?<br/>How does this relate now to PTBi's data strengthening part?<br/>What are your experiences with PTBi's data strengthening – probe implementation successes &amp; challenges<br/>Has there been any success with integration to County/sub county and national data systems? What do you think of it's continuity?<br/>What is working? What would you like to see improved?</p> |
| <i>Perceived Impact</i>                                               | <p>Which of the four components (PRONTO, QI, mSCC &amp; Data) is likely to continue/be mainstreamed &amp; why?<br/>What effect has the project had on this hospital? – <i>Probe both positive &amp; negative e.g. new skills or heavier workloads respectively</i><br/>What has worked well? What would you like to see improved?</p>                                                                                                                                                                                                                                                                                                                                                                                                                                                                                      |
| <i>Concluding<br/>Remarks</i>                                         | <ul style="list-style-type: none"> <li>• As we conclude, is there anything else you'd like to tell us in regards to what we've just discussed? Anything that you think would be useful for this evaluation or for preterm/newborn care?</li> </ul> <p style="text-align: center;"><b>THANK YOU</b></p>                                                                                                                                                                                                                                                                                                                                                                                                                                                                                                                     |
